# Supplementary material
Source: PubMed Central journal article supplement (PMC2447624)

## SUPPLEMENTAL FIGURE LEGEND

### **Figure S1. EGR1 synergizes the mCAR-mediated transcription in HepG2 cells.**

The -1.8-kb *CYP2B6* promoter was co-transfected with pcDNA3.1-mCAR, pcDNA3.1-EGR1 or pcDNA3.1-mCAR plus pcDNA3.1-EGR1 into HepG2 cells for 24 hr, followed by treatment with DMSO or TCPOBOP (250 nM) for additional 48 hr. Subsequently, HepG2 cells were homogenized and subjected to luciferase activity. When required, pcDNA3.1 was transfected as control plasmid. Reporter activity was calculated by dividing firefly luciferase with renilla luciferase (phRL-SV40) activities.

# Inoue and Negishi, Supplemental Figure S1

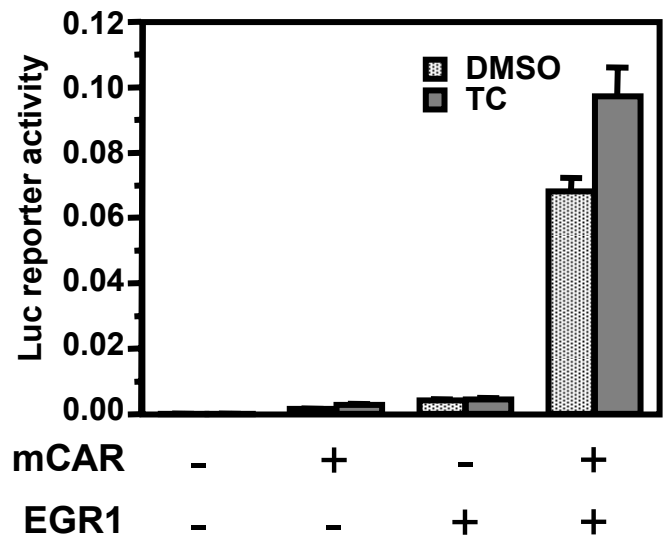

Supplement: M800729200_1.pdf [file M800729200_1.pdf]
